# Supplementary material
Source: publisher site journal article supplement (https://www.dovepress.com/article/256165)
Supplement: Supplementary file 1 [file get_supplementary_file.php]

**Online supplementary figure 1** Methodology to analyze recommendations and finalize themes in NCD management.


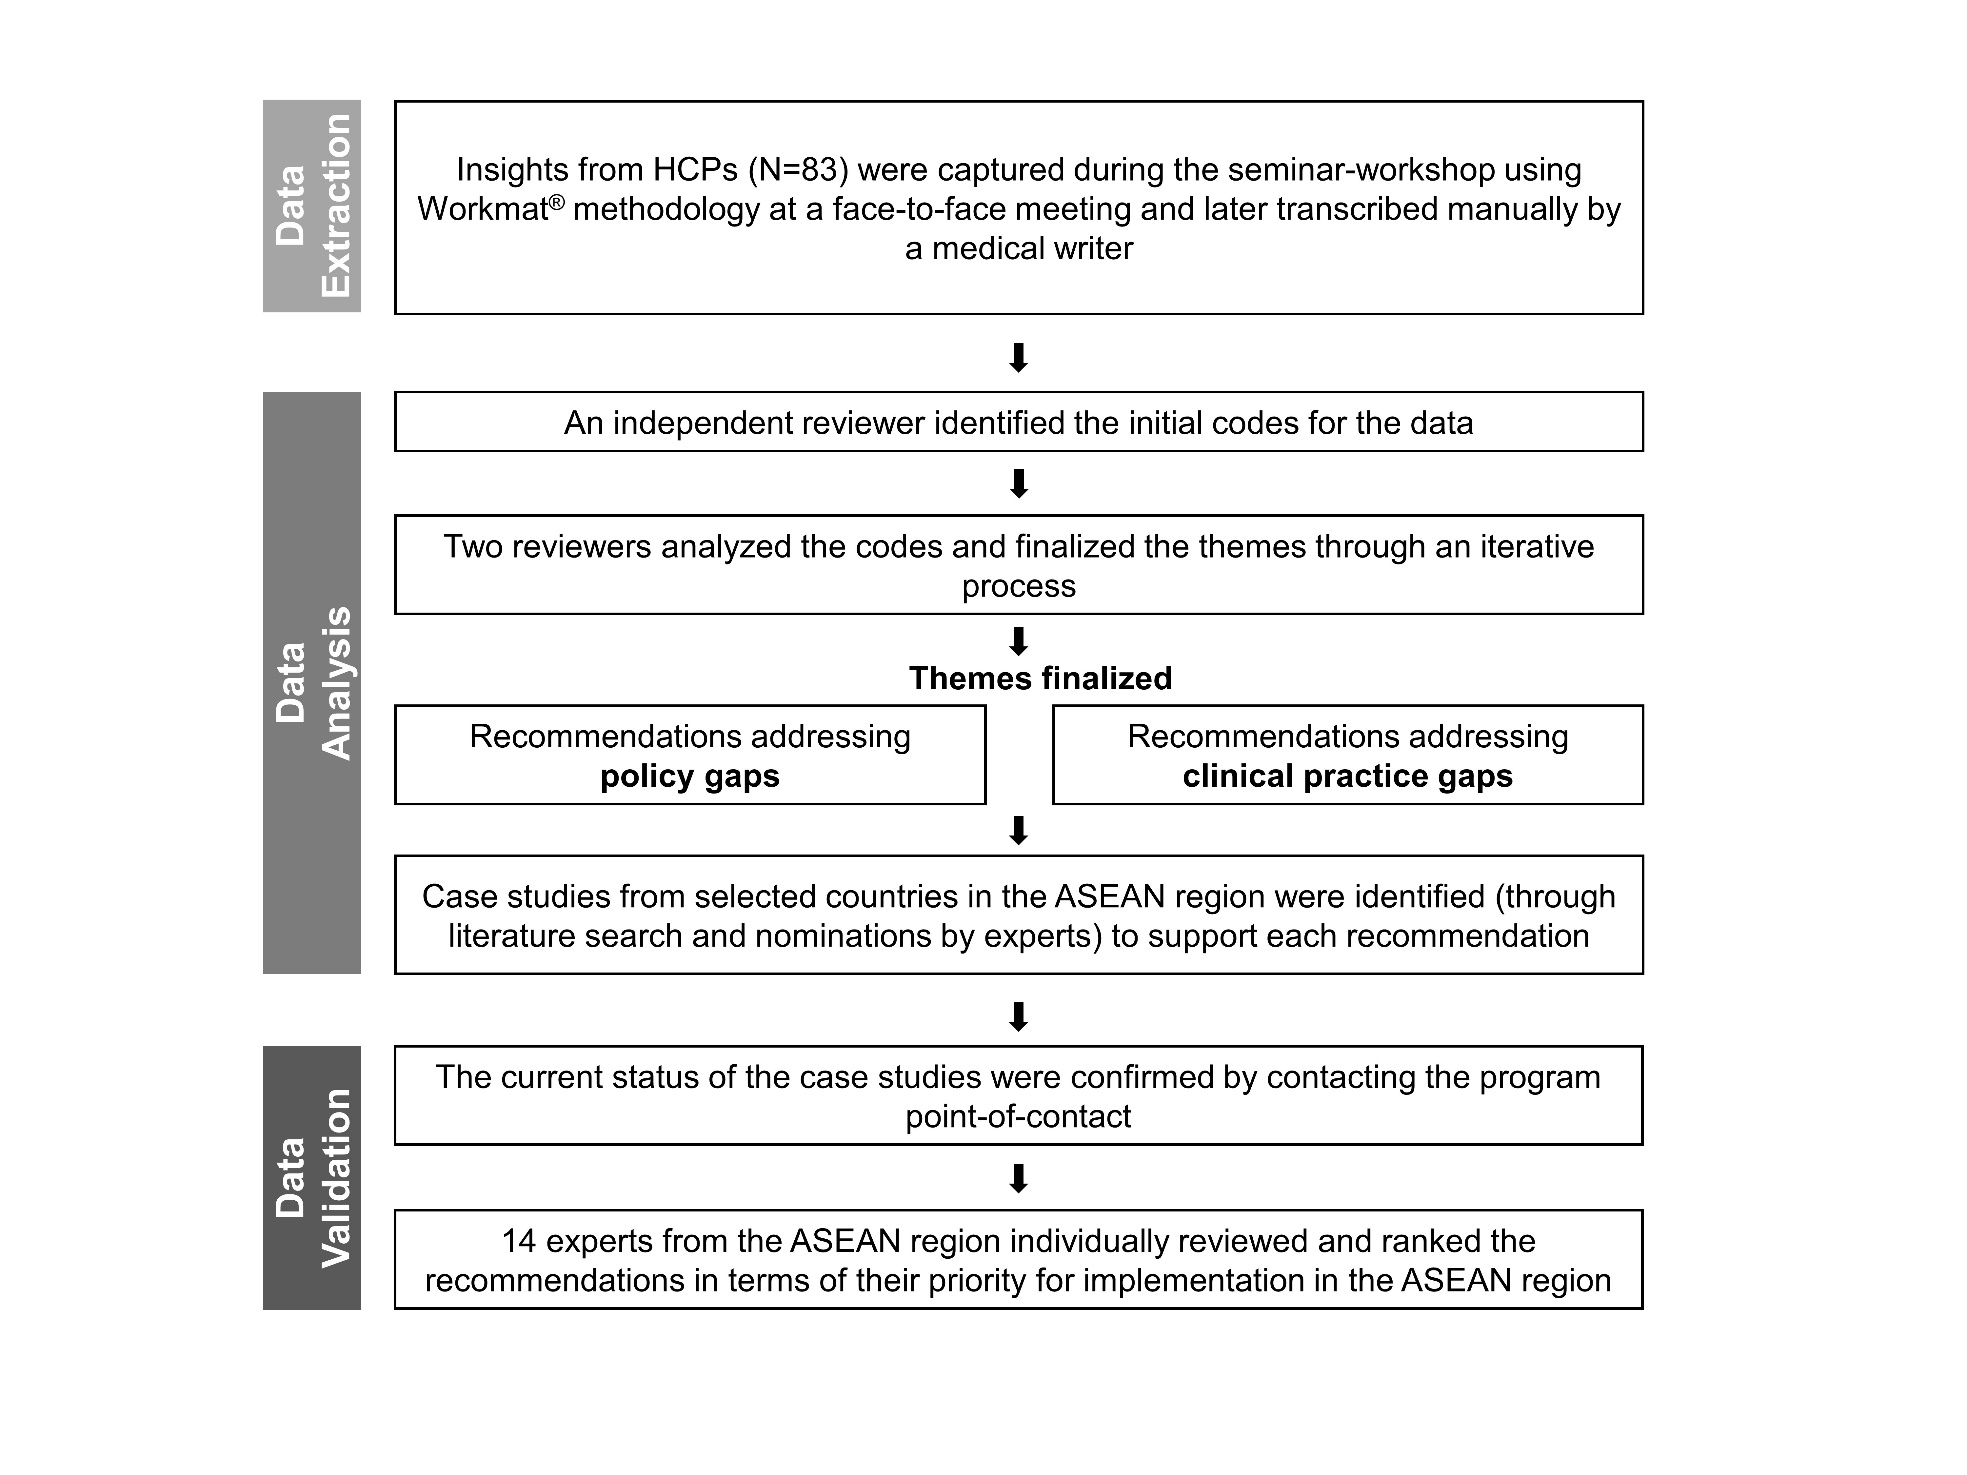


Abbreviations: ASEAN, Association of Southeast Asian Nations, HCPs, Healthcare professionals; NCD, non-communicable diseases
